1 A Generalized Robust Allele-based Genetic Association  
2 Test

3 Lin Zhang<sup>1</sup> and Lei Sun<sup>1,2</sup>

4 <sup>1</sup>Department of Statistical Sciences, University of Toronto, 100 St. George  
5 Street, Toronto, Ontario M5S 3G3, Canada, linzhang@utstat.toronto.edu

6 <sup>2</sup>Division of Biostatistics, Dalla Lana School of Public Health, University of  
7 Toronto, 155 College Street, Toronto, Ontario M5T 3M7, Canada,  
8 sun@utstat.toronto.edu

9 March 12, 2020

## 10 **Abstract**

11 The allele-based association test or the allelic test, comparing allele frequency difference between  
12 case and control groups, is locally most powerful. However, the classical allelic test is limited in  
13 applications because it is sensitive to the Hardy–Weinberg equilibrium (HWE) assumption, not ap-  
14 plicable to continuous traits, and not easy to account for covariate effects or sample correlation. To  
15 develop a generalized robust allelic test, we propose a unifying regression model with individual  
16 allele as the response variable. We show that the score test statistic derived from this novel regres-  
17 sion framework contains a correction factor that explicitly adjusts for the departure from HWE and  
18 encompasses the classical allelic test as a special case. When the trait of interest is continuous, the  
19 corresponding allelic test evaluates a weighted difference between individual-level allele frequency  
20 estimate and sample estimate where the weight is proportional to an individual’s trait value, and  
21 the test remains valid under Y-dependent sampling. Finally, the proposed method allows for joint  
22 allele-based association analyses of multiple (continuous or binary) phenotypes, in the presence  
23 of covariates, sample correlation and population heterogeneity. To support our analytical findings,  
24 we provide empirical evidence from both simulation and application studies.

25 *Keywords:* Allele-based association analysis; Correlation; Hardy–Weinberg equilibrium; Multiple  
26 phenotypes; Multiple populations; Relatedness; Robustness.

## 27 1 Introduction

28 A key component of current large-scale genetic studies of complex human traits is association  
 29 analysis. An association study aims to identify genetic markers that influence a heritable trait or  
 30 phenotype of interest, while accounting for environmental effects. To formulate the problem more  
 31 precisely, assume that single nucleotide polymorphisms (SNPs) are the genetic markers available.  
 32 For each bi-allelic SNP, let  $a$  and  $A$  be the two possible alleles, and as in convention let  $A$  denote  
 33 the minor allele with population frequency  $p \leq 0.5$ . The SNP genotype  $G$  for an individual is a  
 34 paired (but unordered) alleles, taking the form of  $aa$ ,  $Aa$  or  $AA$ . For a case-control association  
 35 study of a binary trait (Table 1), intuitively one can compare the estimates of allele frequency of  $A$   
 36 between the case and control groups. Indeed, the resulting allelic test is locally most powerful, but  
 37 the validity of the test hinges on the assumption of Hardy-Weinberg equilibrium (HWE) (Sasieni,  
 38 1997). Counting each genotype  $AA$  contributing two *independent* copies of allele  $A$ , the allelic  
 39 test ‘doubles’ the sample size but implicitly assumes HWE (Sasieni, 1997). That is, the genotype  
 40 frequencies depend only on the allele frequencies as,  $p_{aa} = (1 - p)^2$ ,  $p_{Aa} = 2p(1 - p)$  and  $p_{AA} =$   
 $p^2$ .

Table 1: **Notations for genotype and allele counts for a case-control study.** The HLA-DQ3 example is from Sasieni (1997), studying women with cervical intraepithelial neoplasia 3.

|                                         | Genotype Counts |          |          |       | Allele Counts |              |       |
|-----------------------------------------|-----------------|----------|----------|-------|---------------|--------------|-------|
|                                         | $aa$            | $Aa$     | $AA$     | Total | $a$           | $A$          | Total |
| Case                                    | $r_0$           | $r_1$    | $r_2$    | $r$   | $2r_0 + r_1$  | $r_1 + 2r_2$ | $2r$  |
| Control                                 | $s_0$           | $s_1$    | $s_2$    | $s$   | $2s_0 + s_1$  | $s_1 + 2s_2$ | $2s$  |
| Total                                   | $n_{aa}$        | $n_{Aa}$ | $n_{AA}$ | $n$   | $n_a$         | $n_A$        | $2n$  |
|                                         | $n_0$           | $n_1$    | $n_2$    |       | $2n_0 + n_1$  | $n_1 + 2n_2$ |       |
| The HLA-DQ3 example from Sasieni (1997) |                 |          |          |       |               |              |       |
| Case                                    | 40              | 45       | 28       | 113   | 125           | 101          | 226   |
| Control                                 | 273             | 100      | 43       | 416   | 646           | 186          | 832   |
| Total                                   | 313             | 145      | 71       | 529   | 771           | 287          | 1058  |

42 For a population to be in HWE, several assumptions must be (approximately) true includ-  
43 ing random mating, infinite population size, and no inbreeding, mutation, migration, or selection  
44 (Hardy et al., 1908; Weinberg, 1908). To evaluate the HWE assumption using an independent  
45 sample as in Table 1, one typically applies the Pearson goodness-of-fit  $\chi^2$  test,  $\sum_{i=1}^3 \frac{(O_i - E_i)^2}{E_i} =$   
46  $\frac{(n_0 - n(1-p))^2}{n(1-p)^2} + \frac{(n_1 - n2p(1-p))^2}{n2p(1-p)} + \frac{(n_2 - np^2)^2}{np^2} \sim \chi_2^2$ . In practice, allele frequency  $p$  is often unknown  
47 and commonly replaced by the sample estimate resulting in loss of degrees of freedom (d.f.). The  
48 resulting Pearson-based HWE test thus has the following form,

$$T_{\text{HWE, Pearson}} = \frac{(n_0 - n(1 - \hat{p}))^2}{n(1 - \hat{p})^2} + \frac{(n_1 - n2\hat{p}(1 - \hat{p}))^2}{n2\hat{p}(1 - \hat{p})} + \frac{(n_2 - n\hat{p}^2)^2}{n\hat{p}^2} \sim \chi_1^2, \quad (1)$$

49 where  $\hat{p} = (n_1 + 2n_2)/2n$ . Using the HLA-DQ3 data in Table 1 as an illustration, among a total of  
50 529 individuals 313, 145 and 71 have genotypes, respectively,  $aa$ ,  $Aa$  and  $AA$ . Direct application  
51 of  $T_{\text{HWE, Pearson}}$  yields a test statistic of 49.7623 and a  $p$ -value of  $1.74 \times 10^{-12}$ , suggesting that  
52 the population is not in HWE.

53 In the presence of Hardy-Weinberg disequilibrium (HWD), the size of the classical allelic test  
54 is not controlled at the nominal level (Sasieni, 1997). Efforts have been made to alleviate this  
55 problem, mainly along the line of improving variance estimate of the original test statistic (Schaid  
56 and Jacobsen, 1999). However, this improvement does not resolve several important issues present  
57 in more complex data, including how to analyze continuous traits, how to include covariates, and  
58 how to cope with related individuals from families or pedigree data.

59 Consequently, most if not all current genetic association studies rely on genotype-based re-  
60 gression models, where the response variable is phenotype  $Y$  and the predictors include genotype  
61  $G$  and other covariates. For the three genotype groups,  $aa$ ,  $Aa$  and  $AA$ , the coding is commonly  
62 additive as 0, 1 and 2 (Hill et al., 2008). Note that although the genotype  $AA$  is also given a value  
63 of two here, the genotype-based approach is robust to HWD. This is because the  $Y - G$  regression  
64 is performed conditional on genotype  $G$ , and the value two here merely specifies that the effect of

65  $G = AA$  on  $Y$  is twice that of  $G = Aa$  on  $Y$  (i.e. additively). Nevertheless, it is a bit mysterious  
66 how exactly a genotype-based test statistic accounts for HWD. Further, the actual data collection  
67 typically starts with sampling individuals based on  $Y$ , which can be a random or  $Y$ -dependent sam-  
68 pling (Derkach et al., 2015). It then genotypes the sampled individuals to obtain  $G$ . Thus, it can be  
69 argued that the  $G - Y$  regression is a more fitting statistical framework. This ‘reverse’ regression  
70 approach can also readily analyze multiple phenotypes simultaneously, which was the motivation  
71 behind the development of MultiPhen (O’Reilly et al., 2012). To deal with the three genotype  
72 groups, O’Reilly et al. (2012) used an ordinal logistic regression and stated that the proposed like-  
73 lihood ratio test does not assume HWE. However, the statistical insight is lacking and analyzing  
74 pedigree data remains a challenge.

75 This work generalizes the locally most powerful allele-based association test to more complex  
76 settings by developing a novel *allele-based* ‘reverse’ regression framework. In what follows, Sec-  
77 tion 2 first revisits the classical allelic test, providing insight about the need for a more flexible  
78 formulation of the allelic test. Section 3 then develops the new allele-based ‘reverse’ regression  
79 framework by first appropriately partitioning the two alleles of a genotype then specifying the  
80 individual allele as the response variable. In addition to the parameter that captures the phenotype-  
81 genotype association, the proposed regression framework includes a new parameter that models  
82 the dependency between the two alleles of a genotype, explicitly accounting for potential departure  
83 from HWE. This section also provides examples that highlight the unifying feature of the proposed  
84 framework for both association analysis and HWE testing itself. Section 4 considers more com-  
85 plex settings including related individuals from pedigree data, genetic markers with more than two  
86 alleles, and multiple phenotypes and populations. Given the theoretical results presented, simu-  
87 lation experiments in Section 5 are relatively brief with additional empirical evidence from two  
88 applications. Section 6 concludes with remarks and discussion.

## 89 2 The classical allelic test revisited

90 For a given SNP and a binary phenotype of interest, let  $p_r$  denote the population frequency of allele  
91  $A$  for the cases and  $p_s$  for the controls. A test of no association between the SNP and the disease  
92 status is to test the null hypothesis that  $H_0: p_r = p_s$ . The classical allelic test is a direct application  
93 of the standard test that compares two proportions using a pooled sample estimate of the variance,

$$T_{\text{allelic}} = \frac{(\hat{p}_r - \hat{p}_s)^2}{\left(\frac{1}{2r} + \frac{1}{2s}\right)\hat{p}(1 - \hat{p})} \stackrel{\text{HWE}}{\sim} \chi_1^2, \quad (2)$$

94 where, using the notations in Table 1,  $\hat{p}_r = (2r_2 + r_1)/2r = r_A/2r$ ,  $\hat{p}_s = (2s_2 + s_1)/2s = s_A/2s$  and  
95  $\hat{p} = (2n_2 + n_1)/2n = n_A/2n$  are the sample estimates of allele frequency, respectively, in the case,  
96 control and combined groups.

The validity of  $T_{\text{allelic}}$  however requires the Hardy–Weinberg equilibrium assumption, because  
only under HWE  $n_A \sim \text{Binomial}(2n, p)$ , and

$$\widehat{\text{var}}(\hat{p}_r - \hat{p}_s) \stackrel{\text{HWE}}{=} \left(\frac{1}{2r} + \frac{1}{2s}\right)\hat{p}(1 - \hat{p}).$$

97 Using the HLA-DQ3 data in Table 1 as an example, the HWE test in Section 1 has shown that the  
98 assumption of HWE is violated. Thus, a direct application of the allelic association test in this case  
99 ( $T_{\text{allelic}} = 44.847$  corresponding to a  $p$ -value of  $2.13 \times 10^{-11}$ ) is not appropriate.

Indeed, Sasieni (1997) has pointed out that  $T_{\text{allelic}}$  is valid and locally most powerful if and  
only if the HWE assumption holds and the genetic effect is additive (Web Appendix A). It is now  
well known that  $T_{\text{allelic}}$  can have inflated type 1 error rate. However, we emphasize that this is true  
only if there is an excess of homozygotes  $AA$ , i.e.  $\delta > 0$ , where

$$\delta = p_{AA} - p^2$$

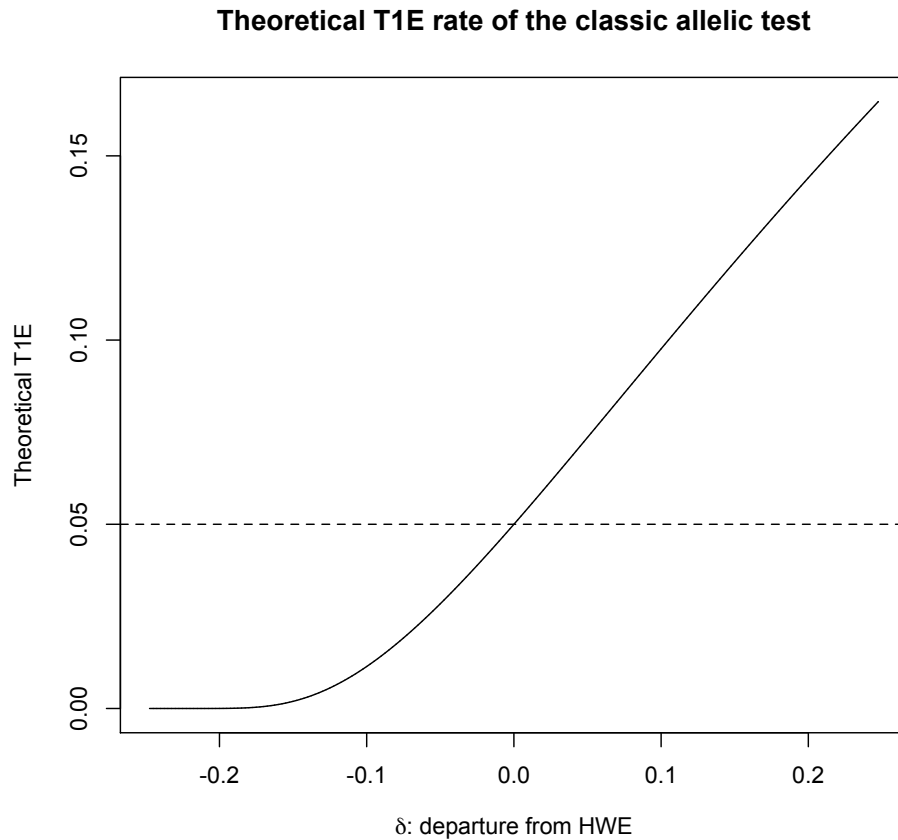

Figure 1: **The theoretical type 1 error rate of the classical allelic test,  $T_{\text{allelic}}$ , at the nominal level of  $\alpha = 0.05$ , with respect to departure from HWE,  $\delta$ .**  $\delta = p_{AA} - p^2$  is the classical measure of departure from HWE (Weir, 1996), where  $p$  is the frequency of the minor allele  $A$  and  $-p^2 \leq \delta \leq p(1-p)$ . When  $p = 0.5$ ,  $-0.25 \leq \delta \leq 0.25$ .

100 is the most commonly used measure of Hardy–Weinberg disequilibrium (Weir, 1996). If  $\delta < 0$ ,

101  $T_{\text{allelic}}$  is conservative as shown in Figure 1.

To robustify  $T_{\text{allelic}}$  against HWD, Schaid and Jacobsen (1999) proposed a variance adjustment by directly modeling the genotype counts using a multinomial distribution. For the case group,  $(r_0, r_1, r_2) \sim \text{Multinomial}\{r, (p_{aa}, p_{Aa}, p_{AA})\}$  under the null hypothesis of no association, and  $\widehat{\text{var}}(\hat{p}_r) = \widehat{\text{var}}((2r_2 + r_1)/2r) = (\hat{p}(1 - \hat{p}) + (\hat{p}_{AA} - \hat{p}^2))/2r = (\hat{p}(1 - \hat{p}) + \hat{\delta})/2r$ , similarly

for the control group replacing  $r$  with  $s$ . Hence,

$$\widehat{\text{var}}(\hat{p}_r - \hat{p}_s) = \left(\frac{1}{2r} + \frac{1}{2s}\right)(\hat{p}(1 - \hat{p}) + \hat{\delta}),$$

102 and the resulting test statistic is robust against HWD,

$$T_{\text{allelic, Schaid}} = \frac{(\hat{p}_r - \hat{p}_s)^2}{\left(\frac{1}{2r} + \frac{1}{2s}\right)(\hat{p}(1 - \hat{p}) + \hat{\delta})} \sim \chi_1^2. \quad (3)$$

103 The revised variance estimate has a correction term,  $\hat{\delta} = (\hat{p}_{AA} - \hat{p}^2)$ , which is the sample  
104 estimate of  $\delta$  (Weir, 1996). Later in Section 3, we will provide analytical insight about how  $\delta$  is  
105 related to  $T_{\text{HWE, Pearson}}$  in (1). For now, it is clear that the denominator of  $T_{\text{allelic}}$  can be smaller  
106 or larger than that of  $T_{\text{allelic, Schaid}}$ , resulting in inflated (when  $\hat{\delta} > 0$ ) or deflated (when  $\hat{\delta} < 0$ )  
107 type 1 error rate. In the HLA-DQ3 example,  $\hat{\delta} = 0.061$ . Thus, the classical allelic test will be too  
108 optimistic with  $\{T_{\text{allelic}} = 44.8470\} > \{T_{\text{allelic, Schaid}} = 34.3207\}$ .

109 This robust-variance approach is effective but limited to the simplest setting of case-control  
110 studies using independent observations with no covariates. In the presence of sample correlation,  
111 direct modifications of the  $\hat{\delta}$  term, or more generally the analytical expression of  $T_{\text{allelic, Schaid}}$ ,  
112 can be difficult. For example, it is not clear if  $r$  and  $s$  should be simply replaced by the effec-  
113 tive numbers of sample size of the case and control groups, provided we know how to estimate  
114 them. It is also not clear how to use this comparing-two-proportions analytical framework to ad-  
115 just for covariate effects or analyze other types of phenotype data, whereas many complex traits  
116 are continuous. Thus, an alternative formulation of allele-based association test is needed.



### 117 3 A Generalized Robust Allele-based (RA) Association Test

#### 118 3.1 Decoupling the two alleles in a genotype

119 Consider a SNP with genotype  $G \in \{aa, Aa, AA\}$  and for the moment assume that there are  $n$  in-  
 120 dependent observations,  $G_i, i = 1, \dots, n$ . The partition of the homozygous genotypes  $aa$  and  $AA$   
 121 is straightforward, but the partition of the heterozygous genotype  $Aa$  requires additional consid-  
 122 erations because of the unknown ordering of the two alleles (i.e.  $Aa$  and  $aA$  equally likely). We  
 123 partition each  $G_i$  as follows,

$$(G_{i1}, G_{i2}) = \begin{cases} (0, 0) & \text{if the genotype is } aa \\ (0, 1) & \text{if the genotype is } Aa \text{ and } c_i = 0 \\ (1, 0) & \text{if the genotype is } Aa \text{ and } c_i = 1 \\ (1, 1) & \text{if the genotype is } AA \end{cases} \quad (4)$$

124 where  $c_i \stackrel{iid}{\sim} \text{Bernoulli}(1/2)$  if  $G_i = Aa$  for  $i = 1, \dots, n$ .

125 Previous work attempted to split the  $n_{Aa}$  observations equally; exactly half of the  $n_{Aa}$  obser-  
 126 vations have  $(G_{i1}^*, G_{i2}^*) = (0, 1)$  and the other half have  $(G_{i1}^*, G_{i2}^*) = (1, 0)$  (Schaid et al., 2012;  
 127 Bourgain et al., 2003). That is,  $\sum_i G_{i1}^* \equiv \sum_i G_{i2}^* \equiv n_{AA} + n_{Aa}/2$ . However, this even-split approach  
 128 reduces the variation inherent in a randomly selected allele. One can show that  $\text{var}(\sum_i G_{i1}^*) =$   
 129  $n(p_{AA} + p_{Aa}/4 - (p_{AA} + p_{Aa}/2)^2)$  while  $\text{var}(\sum_i G_{i1}) = \text{var}(\sum_i G_{i1}^*) + np_{Aa}/4$ ; the use of a fair coin  
 130 in our proposed approach ensures that  $\sum_i G_{i1} \sim \text{Binomial}(n, p_{AA} + p_{Aa}/2)$  and similarly for  $\sum_i G_{i2}$   
 131 (Web Appendix B). As we will see in the following sections, this subtle difference in how we de-  
 132 couple the two alleles in a genotype, as compared with previous work, leads to correct inference  
 133 for both association and HWE analyses.

### 134 3.2 Reformulating the test of HWE as an allele-based regression

A critical component of developing a robust allelic association test is the modelling of the Hardy–Weinberg equilibrium assumption. HWE assumes that the two alleles in a genotype are independent of each other. Thus, given the introduction of the two allele-based binary variables,  $G_{i1}$  and  $G_{i2}$  in (4), a natural approach is to use the following logistic regression,

$$\text{logit}(E(G_{i1})) = \log\left(\frac{p_i}{1-p_i}\right) = \alpha + \beta G_{i2},$$

135 and reformulate testing of HWE as testing of the regression coefficient  $\beta$ . Indeed, we can show  
136 that the corresponding score test of  $H_0 : \beta = 0$  closely approximates  $T_{\text{HWE, Pearson}}$ , the Pearson  $\chi^2$   
137 test derived from the genotype count data (Web Appendix C).

138 Since our primary interest is testing (not estimation), we can also implement a Gaussian model,

139

$$G_{i1} = \alpha + \beta G_{i2} + \varepsilon_i, \quad \text{where } \varepsilon_i \stackrel{iid}{\sim} N(0, \sigma^2). \quad (5)$$

140 The score test derived from this Gaussian model is in fact identical to that from the logistic model.  
141 More generally, Chen (1983) has shown that, under some regularity conditions, the score test  
142 statistics for regression models from the exponential family have identical form.

143 One can also show that (linearly) regressing  $G_{i2}$  on  $G_{i1}$  leads to the same conclusion. However,  
144 the differential treatment and interpretation of  $G_{i1}$  and  $G_{i2}$  is not ideal. Further, the regression  
145 framework (5) uses  $n$  alleles as the response whereas there are  $2n$  alleles given a sample of  $n$   
146 genotypes. Thus, we consider an alternative regression formulation that ‘doubles’ the sample size,  
147 with both alleles as the response.

148 In the revised regression, instead of using the location parameter  $\beta$  to represent the dependence  
149 between the two alleles, we re-parameterize it as the correlation parameter  $\rho$  in the covariance ma-  
150 trix to capture HWD. This model reformulation is particularly beneficial for methodology develop-

151 ment in Section 3.3 where the regression coefficient is reserved for the primary goal of association  
 152 testing. The proposed RA regression for HWE testing is

$$\begin{pmatrix} G_{i1} \\ G_{i2} \end{pmatrix} = \alpha \begin{pmatrix} 1 \\ 1 \end{pmatrix} + \begin{pmatrix} \varepsilon_{i1} \\ \varepsilon_{i2} \end{pmatrix}, \quad \text{where } \begin{pmatrix} \varepsilon_{i1} \\ \varepsilon_{i2} \end{pmatrix} \stackrel{iid}{\sim} N\left(0, \sigma^2 \begin{pmatrix} 1 & \rho \\ \rho & 1 \end{pmatrix}\right). \quad (6)$$

153 The score test statistic of testing  $H_0 : \rho = 0$  is

$$T_{\text{HWE, RA}} = \frac{(\bar{g}_{12} - \bar{g}^2)^2}{\frac{1}{n}\bar{g}^2(1 - \bar{g})^2} = \frac{(\hat{p}_{AA} - \hat{p}^2)^2}{\frac{1}{n}\hat{p}^2(1 - \hat{p})^2} = \frac{\hat{\delta}^2}{\frac{1}{n}\hat{p}^2(1 - \hat{p})^2} \sim \chi_1^2, \quad (7)$$

154 where  $\bar{g}_{12} = \sum_i g_{i1}g_{i2}/n = n_{AA}/n = \hat{p}_{AA}$  and  $\bar{g} = (\sum_i (g_{i1} + g_{i2}))/2n = (2n_{AA} + n_{Aa})/2n = \hat{p}$ . Note  
 155 that  $\hat{\rho} = (\hat{p}_{AA} - \hat{p}^2)/(\hat{p}(1 - \hat{p})) = \hat{\delta}/(\hat{p}(1 - \hat{p}))$ , which is a scaled estimate of HWD.

156 We first note that the newly developed HWE test statistic is, attractively, proportional to  $\hat{\delta} =$   
 157  $\hat{p}_{AA} - \hat{p}^2$ . Interestingly, after some algebraic manipulations we can show that  $T_{\text{HWE, RA}}$  in (7) is  
 158 identical to  $T_{\text{HWE, Pearson}}$  in (1),

$$\begin{aligned} T_{\text{HWE, Pearson}} &= \frac{(n_0 - n(1 - \hat{p}))^2}{n(1 - \hat{p})^2} + \frac{(n_1 - n2\hat{p}(1 - \hat{p}))^2}{n2\hat{p}(1 - \hat{p})} + \frac{(n_2 - n\hat{p}^2)^2}{n\hat{p}^2} \\ &= \frac{(n_2 - n\hat{p}^2)^2}{n} \left( \frac{1}{(1 - \hat{p})^2} + \frac{2}{\hat{p}(1 - \hat{p})} + \frac{1}{(\hat{p})^2} \right) \\ &= \frac{(\hat{p}_{AA} - \hat{p}^2)^2}{\frac{1}{n}\hat{p}^2(1 - \hat{p})^2} = \frac{\hat{\delta}^2}{\frac{1}{n}\hat{p}^2(1 - \hat{p})^2} \sim \chi_1^2. \end{aligned} \quad (8)$$

159 *Remark 1.* For a sample of unrelated individuals, the score test of  $H_0 : \rho = 0$  based on the  
 160 Gaussian regression model of (6) is identical to the classical Pearson's  $\chi^2$  test of HWE in (1)  
 161 (or re-expressed in (8)) based on genotype count data,  $T_{\text{HWE, RA}} = T_{\text{HWE, Pearson}}$ .

162 This equivalence, however, is under the simplest scenario of an independent sample. For more  
 163 complex data, several authors have proposed different HWE testing strategies, each addressing  
 164 a specific challenge (Troendle and Yu, 1994; Bourgain et al., 2004; Lauretto et al., 2009). For

165 example, Troendle and Yu (1994) developed a method that tests HWE across strata, while Bourgain  
 166 et al. (2004) proposed a quasi-likelihood method that tests HWE in related individuals. In Section 4  
 167 we will show how the proposed regression framework (6) can be extended to derive a generalized  
 168 HWE test suitable for complex data. For the moment, we still consider an independent sample but  
 169 turn our attention to association analysis.

### 170 3.3 The generalized robust allele-based (RA) association test via regression

171 As before, we start with an independent sample of size  $n$ . For a given bi-allelic SNP, we continue  
 172 to use the previous notations for the two allele-based random variables,  $G_{i1}$  and  $G_{i2}$ ,  $i = 1, \dots, n$ , as  
 173 constructed in (4). We now also consider  $Y$ , a (categorical or continuous) phenotype of interest, and  
 174  $Z$ , an environmental factor or other covariates available;  $Z$  can be multi-dimensional but denoted  
 175 as one random variable for notation simplicity but without loss of generality. The proposed RA  
 176 regression for association analysis is as follows,

$$\begin{pmatrix} G_{i1} \\ G_{i2} \end{pmatrix} = (\alpha + \beta Y_i + \gamma Z_i) \begin{pmatrix} 1 \\ 1 \end{pmatrix} + \begin{pmatrix} \varepsilon_{i1} \\ \varepsilon_{i2} \end{pmatrix}, \quad \text{where } \begin{pmatrix} \varepsilon_{i1} \\ \varepsilon_{i2} \end{pmatrix} \stackrel{iid}{\sim} N(0, \sigma^2 \begin{pmatrix} 1 & \rho \\ \rho & 1 \end{pmatrix}). \quad (9)$$

177 Based on the above model, it is clear that testing  $H_0 : \beta = 0$  is evaluating the relationship between  
 178 the SNP and phenotype of interest while adjusting for covariate effects. The corresponding score  
 179 test is

$$T_{\text{RA}} = \frac{\{\sum_{i=1}^n \sum_{j=1}^2 (g_{ij} - \hat{p} - \hat{\gamma}(z_i - \bar{z})) y_i\}^2}{2(1 - \hat{\rho}_{Y,Z}^2) \sum_i (y_i - \bar{y})^2 (\hat{p}(1 - \hat{p}) + \hat{\delta})} \sim \chi_1^2, \quad (10)$$

180 where  $\hat{p}$  and  $\hat{\delta}$  are defined as before,  $\bar{y}$  and  $\bar{z}$  are the sample means, and

$$\hat{\alpha} = \hat{p} - \hat{\gamma}\bar{z}, \quad \hat{\gamma} = \frac{\sum_i (g_{i1} + g_{i2}) z_i - \hat{p}\bar{z}}{\sum_i (z_i - \bar{z})^2}, \quad \text{and} \quad \hat{\rho}_{Y,Z} = \frac{\sum_i y_i z_i - \bar{y}\bar{z}}{\sqrt{\sum_i (y_i - \bar{y})^2} \sqrt{\sum_i (z_i - \bar{z})^2}}.$$

181 The proposed  $T_{\text{RA}}$  unifies previous methods. For example, if  $Y$  is binary and  $\gamma = 0$  as in a

182 case-control study without covariates,  $T_{RA}$  in (10) is simplified to

$$T_{RA, \text{ binary}, \gamma=0} = \frac{(\hat{p}_r - \hat{p}_s)^2}{\left(\frac{1}{2r} + \frac{1}{2s}\right)(\hat{p}(1 - \hat{p}) + \hat{\delta})}. \quad (11)$$

183 If we further assume HWE (i.e. let  $\rho = 0$ ), the corresponding score test is reduced to

$$T_{RA, \text{ binary}, \gamma=0, \rho=0} = \frac{(\hat{p}_r - \hat{p}_s)^2}{\left(\frac{1}{2r} + \frac{1}{2s}\right)\hat{p}(1 - \hat{p})}. \quad (12)$$

184 *Remark 2.* Under the HWE assumption and for a case-control study using an independent  
 185 sample without covariates, the score test of  $H_0 : \beta = 0$  based on the proposed RA regression  
 186 model (9) is identical to the classical allelic test in (2),  $T_{RA, \text{ binary}, \gamma=0, \rho=0} = T_{\text{allelic}}$ . In the  
 187 presence of HWD, the corresponding score test has an additional correction factor  $\hat{\delta} = \hat{p}_{AA} -$   
 188  $\hat{p}^2$  for the variance estimate as compared to  $T_{\text{allelic}}$ , and  $T_{RA, \text{ binary}, \gamma=0} = T_{\text{allelic}}$ , Schaid.

189 The proposed RA testing framework also generalizes. For example,  $T_{RA}$  accounts for covariate  
 190 effects.  $T_{RA}$  also analyzes any phenotypes, binary or continuous, by generalizing the concept of  
 191 comparing two proportions between two groups ( $H_0 : p_r = p_s$ ) to testing regression coefficient  
 192 ( $H_0 : \beta = 0$ ). To provide additional analytical insight, consider a continuous trait and constrain the  
 193 full model (9) to be without covariates. In that case, the corresponding score test statistic has the  
 194 expression of

$$T_{RA, \gamma=0} = \frac{\{\sum_i ((g_{i1} + g_{i2})/2 - \hat{p})y_i\}^2}{\frac{1}{2}\sum_i (y_i - \bar{y})^2(\hat{p}(1 - \hat{p}) + \hat{\delta})}. \quad (13)$$

195 Thus, the generalized RA test evaluates a weighted difference between individual-level allele fre-  
 196 quency estimate,  $(g_{i1} + g_{i2})/2$ , and the whole sample estimate,  $\hat{p} = \sum_i (g_{i1} + g_{i2})/2n$ , where the  
 197 weight is an individual's trait value,  $y_i$ .

198 *Remark 3.* The proposed robust allele-based regression (9) delivers a more flexible allelic  
 199 test,  $T_{RA}$  in (10), that analyzes both categorical and continuous phenotypes while accounting  
 200 for covariate effects. Because the regression model is conditional on  $Y$ , the phenotype data

201 can be subjected to  $Y$ -dependent sampling.

202 In hindsight, results so far may not be surprising. However, the advantages of developing the pro-  
203 posed RA regression framework become evident when extending allele-based association methods  
204 to more complex data such as pedigree data and data with population heterogeneity, which we  
205 investigate in the next section.

## 206 **4 Complex data**

### 207 **4.1 Multiple populations**

208 The classical allelic test is limited to a sample of individuals from the same population, but popula-  
209 tion heterogeneity is often present in large-scale datasets (Diaz-Papkovich et al., 2019). Intuitively,  
210 one may use a weighted average of the test statistics obtained from the individual populations.  
211 However, it is not clear how to derive the optimal weight, and it is also difficult to extend such  
212 an approach to non-discrete populations as in principal component analyses (PCA) (Reich et al.,  
213 2008).

214 The proposed RA regression model of (9) can naturally adjust for population effects by in-  
215 cluding population indicators, or the top principal components inferred from PCA, as part of the  
216 covariates. Here we emphasize that the potential population effects could include both difference  
217 in allele frequency and difference in Hardy–Weinberg disequilibrium between populations. The  
218 RA framework, desirably, not only models allele frequency heterogeneity through the regression  
219 coefficient  $\gamma$  but also accounts for HWD heterogeneity through  $\rho$  in the covariance matrix.

220 Without loss of generality, it is instructive to consider the simple case of a case-control study  
221 with two populations but without additional covariates. Let  $Z_i = 0$  for population I and  $Z_i = 1$  for

222 population II, the corresponding RA regression model is

$$\begin{pmatrix} G_{i1} \\ G_{i2} \end{pmatrix} = (\alpha + \beta Y_i + \gamma Z_i) \begin{pmatrix} 1 \\ 1 \end{pmatrix} + \begin{pmatrix} \epsilon_{i1} \\ \epsilon_{i2} \end{pmatrix}, \quad \text{where} \quad \begin{pmatrix} \epsilon_{i1} \\ \epsilon_{i2} \end{pmatrix} \sim N(0, \sigma_i^2 \begin{pmatrix} 1 & \rho_i \\ \rho_i & 1 \end{pmatrix}), \quad (14)$$

223  $\rho_i = \rho^I$  and  $\sigma_i^2 = (\sigma^I)^2$  if  $Z_i = 0$ ;  $\rho_i = \rho^{II}$  and  $\sigma_i^2 = (\sigma^{II})^2$  if  $Z_i = 1$ . Using superscripts  $I$  and  $II$   
 224 for all the other notations introduced so far, the generalized RA test of  $H_0 : \beta = 0$  while accounting  
 225 for population heterogeneity has the following expression,

$$T_{\text{RA, binary, 2 pop}} = \frac{\left\{ \frac{2r^I s^I}{n^I} (\hat{p}_r^I - \hat{p}_s^I) + \frac{2r^{II} s^{II}}{n^{II}} (\hat{p}_r^{II} - \hat{p}_s^{II}) \right\}^2}{2 \left( \frac{r^I s^I}{n^I} + \frac{r^{II} s^{II}}{n^{II}} \right) \left\{ \frac{n^I}{n^I + n^{II}} (\hat{p}^I (1 - \hat{p}^I) + \hat{\delta}^I) + \frac{n^{II}}{n^I + n^{II}} (\hat{p}^{II} (1 - \hat{p}^{II}) + \hat{\delta}^{II}) \right\}} \sim \chi_1^2, \quad (15)$$

226 where  $\hat{\delta}^I = \hat{p}_{AA}^I - (\hat{p}^I)^2$  and  $\hat{\delta}^{II} = \hat{p}_{AA}^{II} - (\hat{p}^{II})^2$  capture any population-specific HWD.

227 Finally, if evaluating HWE across multiple populations is the primary objective, we can achieve  
 228 this by testing  $H_0 : \rho^I = \rho^{II} = 0$  and show that the corresponding score test statistic has the fol-  
 229 lowing form,  $T_{\text{HWE, RA, 2 pop}} = T_{\text{HWE, RA, pop I}} + T_{\text{HWE, RA, pop II}} \sim \chi_2^2$ , where the expressions  
 230 for  $T_{\text{HWE, RA, pop I}}$  and  $T_{\text{HWE, RA, pop II}}$  are given in (7). We note again the unifying feature of the  
 231 proposed RA framework. For example, the test of Troendle and Yu (1994) developed specifically  
 232 for testing HWE across strata has identical form as  $T_{\text{HWE, RA, 2 pop}}$ .

## 233 4.2 Multiple alleles

234 In the previous sections, we have assumed that the genetic marker under study is a bi-allelic SNP  
 235 with two alleles and three unordered genotypes, the most commonly encountered genetic variation.  
 236 Other types of data such as copy number of variations (CNVs) can be of interest (Jakobsson et al.,  
 237 2008), but the corresponding allele-based association test has not been developed. Here we demon-  
 238 strate how the RA model of (9) can be extended to derive a generalized allelic association test for  
 239 multi-allelic markers, with adjustments for covariate effects and Hardy–Weinberg disequilibrium.

240 For a genetic marker with  $K$  different alleles, the total number of possible unordered genotypes  
 241 is  $K(K+1)/2$ , among which  $K(K-1)/2$  are heterozygotes and  $K$  are homozygotes. As in the  
 242 bi-allelic marker case, a critical step in the RA methodology development is the partition of a  
 243 genotype, particularly a heterozygote. Extending the partition method for a bi-allelic marker in  
 244 Section 3.1, we now introduce two indicator vectors,  $g_{i1}$  and  $g_{i2}$ , where  $g_{i1} = (G_{i1}^1, G_{i1}^2, \dots, G_{i1}^{K-1})'$   
 245 and  $g_{i2} = (G_{i2}^1, G_{i2}^2, \dots, G_{i2}^{K-1})'$ .  $G_{i1}^l = 1$  if the first allele is  $l$  and  $G_{i2}^l = 1$  if the second allele is  
 246  $l$ , for  $l < K$ ; allele  $K$  is chosen to be the baseline without loss of generality. The partition of a  
 247 homozygote  $G_i = (l, l)$  is straightforward. For a heterozygote  $G_i = (m, l)$ , the ordering of the two  
 248 alleles depends on the outcome of a Bernoulli trial,  $c_i \stackrel{iid}{\sim} \text{Bernoulli}(1/2)$ , as in the bi-allelic case of  
 249 (4).

**Table 2: Allele partition of the six unordered genotypes for a genetic marker with three alleles,  $A, B$  and  $C$ .** For individual  $i$ ,  $g_{i1} = (G_{i1}^A, G_{i1}^B)'$  and  $g_{i2} = (G_{i2}^A, G_{i2}^B)'$ , denoting the allele status for the first and second allele of genotype  $G_i$ , respectively. For each heterozygous genotype, i.e.  $G_i = AB, AC$  or  $BC$ , the ordering of the two alleles depends on the outcome of  $c_i \stackrel{iid}{\sim} \text{Bernoulli}(1/2)$ .

| Unordered<br>Genotype, $G_i$ | $G_{i1}$   |            | $G_{i2}$   |            |
|------------------------------|------------|------------|------------|------------|
|                              | $G_{i1}^A$ | $G_{i1}^B$ | $G_{i2}^A$ | $G_{i2}^B$ |
| $AA$                         | 1          | 0          | 1          | 0          |
| $AB$                         | $c_i$      | $1 - c_i$  | $1 - c_i$  | $c_i$      |
| $AC$                         | $c_i$      | 0          | $1 - c_i$  | 0          |
| $BB$                         | 0          | 1          | 0          | 1          |
| $BC$                         | 0          | $c_i$      | 0          | $1 - c_i$  |
| $CC$                         | 0          | 0          | 0          | 0          |

250 As an illustration, Table 2 details the allele partition of a tri-allelic marker with three possible



251 alleles,  $A$ ,  $B$  and  $C$ . The corresponding RA regression model is

$$\begin{pmatrix} G_{i1}^A \\ G_{i1}^B \\ G_{i2}^A \\ G_{i2}^B \end{pmatrix} = \begin{pmatrix} \alpha_1 \\ \alpha_2 \\ \alpha_1 \\ \alpha_2 \end{pmatrix} + \begin{pmatrix} \beta_1 \\ \beta_2 \\ \beta_1 \\ \beta_2 \end{pmatrix} Y_i + \begin{pmatrix} \gamma_1 \\ \gamma_2 \\ \gamma_1 \\ \gamma_2 \end{pmatrix} Z_i + \varepsilon_i, \quad \text{where } \varepsilon_i \stackrel{iid}{\sim} N\left(0, \begin{pmatrix} \sigma_1^2 & \delta_1 & \delta_2 & \delta_3 \\ \delta_1 & \sigma_2^2 & \delta_3 & \delta_4 \\ \delta_2 & \delta_3 & \sigma_1^2 & \delta_1 \\ \delta_3 & \delta_4 & \delta_1 & \sigma_2^2 \end{pmatrix}\right), \quad (16)$$

252 and under the null of no association,  $\delta_1 = -p_{APB}$ ,  $\delta_2 = p_{AA} - p_A^2$ ,  $\delta_3 = \frac{1}{2}p_{AB} - p_{APB}$ , and  $\delta_4 =$   
 253  $p_{BB} - p_B^2$ . Testing the association between a tri-allelic marker and a phenotype trait  $Y$  is then  
 254 equivalent to testing  $H_0: \beta_1 = \beta_2 = 0$ , and the resulting score test statistic is  $\chi_2^2$  distributed under  
 255  $H_0$ .

256 Here we note that for a mutli-allelic marker with  $K$  alleles, a *genotype*-based association test  
 257 inherently has  $(K(K+1)/2 - 1)$  d.f. Appropriate genotype coding can reduce the d.f. by restrict-  
 258 ing the relationships between the effects of the  $K(K+1)/2$  genotypes on the phenotype, but the  
 259 most parsimonious yet interpretable model is not well understood (Wang, 2011). In contrast, the  
 260 proposed RA framework is allele-based with  $(K-1)$  d.f., modelling the effect of each allele with  
 261 the chosen baseline allele. The RA model can also be used to derive regression-based test of HWE  
 262 for multi-allelic markers (Web Appendix D).

### 263 4.3 Multiple phenotypes

264 In settings where we are interested in testing the association between a genotype and multiple  
 265  $J$  phenotypes simultaneously, we can simply include multiple  $Y_{j1}$  vectors in the RA model of  
 266 (9), or (16) for a multi-allelic marker, each representing one phenotype, and then test  $H_0: \beta_j =$   
 267  $0, \forall j \in \{1, 2, \dots, J\}$ . The corresponding score test statistic will be  $\chi_J^2$  distributed under the null.  
 268 Here we re-iterate that the proposed ‘reverse’ regression is *allele-based*, conceptually distinct from  
 269 *genotype-based* MultiPhen (O’Reilly et al., 2012) that uses an ordinal logistic regression for an

270 independent sample.

## 271 4.4 Related individuals

272 We now consider a sample of  $n$  correlated individuals with known or accurately estimated pedigree  
 273 structure (Dimitromanolakis et al., 2019). For notation simplicity but without loss of generality,  
 274 we present the RA model for analyzing a bi-allelic marker and one phenotype of interest. Let  $g$   
 275 be a  $2n \times 1$  vector of allele indicators for the  $n$  genotypes available, where  $g = (g'_1, g'_2, \dots, g'_n)'$  and  
 276  $g_i = (G_{i1}, G_{i2})'$  for  $i \in \{1, \dots, n\}$ , following the allele-partition step as outlined in Section 3.1, and  
 277 let  $y = (y'_1, y'_2, \dots, y'_n)'$ ,  $y_i = (Y_i, Y_i)'$ ,  $z = (z'_1, z'_2, \dots, z'_n)'$ , and  $z_i = (Z_i, Z_i)'$ . The generalized RA  
 278 regression model for a dependent sample is,

$$g = \alpha \mathbf{1} + \beta y + \gamma z + \varepsilon, \quad \text{where } \varepsilon \sim N(0, \sigma^2 \Sigma), \quad (17)$$

279  $\mathbf{1}$  is a  $2n \times 1$  vector of 1s, and  $\Sigma$  is a  $2n \times 2n$  matrix that captures the genetic correlation between  
 280 individuals as well as departure from Hardy-Weinberg equilibrium in founders. Founders are in-  
 281 dividuals that only have direct descendants or no related individuals included in the sample, and  
 282 their offspring genotypes are in HWE assuming random mating (Web Appendix E).

283 The specification of  $\Sigma$  is non-trivial, where for any two individuals  $i$  and  $j$ ,  $\Sigma_{2(i-1)+l, 2(j-1)+l'}$ ,  
 284 not only measures the genetic correlation between individual  $i$ 's  $l$ th allele and individual  $j$ 's  $l'$ th  
 285 allele,  $l$  and  $l' \in \{1, 2\}$ , but also accounts for potential HWD. We note that if  $i = j$  and  $l = l'$ ,  
 286  $\Sigma_{2(i-1)+l, 2(j-1)+l'} = 1$ . If  $i = j$  and  $l \neq l'$ ,  $\Sigma_{2(i-1)+l, 2(j-1)+l'} = 0$  for a non-founder and  $= \rho$  for  
 287 a founder, where  $\rho$  models HWD. Finally, if  $i \neq j$ ,  $\Sigma_{2(i-1)+l, 2(j-1)+l'} = \phi_{i,j}(1 + \rho)$ , where  $\phi_{i,j}$  is  
 288 the kinship coefficient between the two individuals (Web Appendix F).

As an illustration, let us consider a sample of  $f$  independent sib-pairs. With a slight abuse of  
 notations, let  $\{G_{j11}, G_{j12}, G_{j21}, G_{j22}\}$  denote the the four alleles of the  $j$ th sib-pair,  $j = 1, \dots, f$ ,  
 where  $\{G_{j11}, G_{j12}\}$  are for sibling 1 and  $\{G_{j21}, G_{j22}\}$  are for sibling 2. In this case,  $\Sigma$  is a block

diagonal matrix with

$$\Sigma_j = \begin{pmatrix} 1 & 0 & \phi(1+\rho) & \phi(1+\rho) \\ 0 & 1 & \phi(1+\rho) & \phi(1+\rho) \\ \phi(1+\rho) & \phi(1+\rho) & 1 & 0 \\ \phi(1+\rho) & \phi(1+\rho) & 0 & 1 \end{pmatrix},$$

289 where  $\phi = 0.25$  is the kinship coefficient for a sib-pair. If we assume that there are no covariates,  
290 the score statistic of testing  $H_0 : \beta = 0$  is

$$T_{\text{RA, sib-pair, } \gamma=0} = \frac{\left[ \frac{1}{1-4\phi^2(1+\hat{\rho})^2} \left\{ \sum_{j=1}^f \sum_{k=1}^2 \sum_{l=1}^2 y_{jk}(g_{jkl} - \bar{g}) - 2\phi(1+\hat{\rho}) \sum_{j=1}^f \sum_{l=1}^2 (y_{j1}(g_{j2l} - \bar{g}) + y_{j2}(g_{j1l} - \bar{g})) \right\} \right]^2}{2\bar{g}(1-\bar{g}) \sum_{j=1}^f \{ (y_{j1} - \bar{y})^2 + (y_{j2} - \bar{y})^2 - 4\phi(1+\hat{\rho})(y_{j1} - \bar{y})(y_{j2} - \bar{y}) \}}, \quad (18)$$

291 where  $y_{j1}$  and  $y_{j2}$  are the phenotype values of the  $j$ th sib-pair,  $\bar{y} = \sum_{j=1}^f \sum_{k=1}^2 y_{jk}/2f$ ,  $\bar{g} = \sum_{j=1}^f \sum_{k=1}^2 \sum_{l=1}^2 g_{jkl}/4f$ ,  
292 and  $\hat{\rho} = \sum_{j=1}^f \sum_{l=1}^2 \{ (g_{j11} - \bar{g})(g_{j2l} - \bar{g}) + (g_{j12} - \bar{g})(g_{j2l} - \bar{g}) \} / (\phi\bar{g}(1-\bar{g})) - 1$ .

293 For further illustration, consider a sib-pair case-control study with all sib-pairs concordant in  
294 phenotype (i.e.  $r$  pairs of cases and  $s$  pairs of controls). In that case, (18) is reduced to

$$T_{\text{RA, sib-pair, binary-concordant, } \gamma=0} = \frac{(\bar{g}_r - \bar{g}_s)^2}{\left(\frac{1}{4r} + \frac{1}{4s}\right)(1+2\phi(1+\hat{\rho}))\bar{g}(1-\bar{g})}, \quad (19)$$

295 where  $\bar{g}_r = \sum_{j=1}^f \sum_{k=1}^2 \sum_{l=1}^2 y_{jk}g_{jkl}/4r$ ,  $\bar{g}_s = \sum_{j=1}^f \sum_{k=1}^2 \sum_{l=1}^2 (1-y_{jk})g_{jkl}/4s$ , and  $\bar{g}$  and  $\hat{\rho}$  are as  
296 defined above. It is compelling that the form of (19) is similar to that of the classic allelic test  
297 in (2). However, the denominator of (19) explicitly adjusts for the inherent genetic correlation  
298 between the sibling alleles through  $\phi$ , as well as any potential HWD through  $\hat{\rho}$ .

299 *Remark 4.* The proposed robust allele-based regression (9) can be naturally generalized to  
300 analyze multiple populations and phenotypes. The RA model (9) can be further generalized

301 to model (16) to analyze genetic markers with more than two alleles, and to model (17) to  
302 analyze pedigree data. With a sample of related individuals, the  $\Sigma$  matrix decomposes into  
303 two parts that explicitly model the genetic correlation between individuals and the departure  
304 from HWE in the founder generation.

## 305 **5 Empirical evidence**

### 306 **5.1 Simulation studies**

307 To numerically demonstrate the robustness of  $T_{RA}$  to HWD as compared with  $T_{allelic}$ , we simulated  
308 a case-control study with an independent sample of 1,000 cases and 1,000 controls. The minor  
309 allele frequency was  $p = 0.2$  or  $0.5$  for the minor allele  $A$ . The amount of HWD as measured  
310 by  $\delta = p_{AA} - p^2$  ranged from the minimum of  $-p^2$  to the maximum of  $p(1 - p)$ . Then  $p_{AA} =$   
311  $\delta + p^2$  and  $p_{Aa} = 2(p - p_{AA})$ , and  $(n_{aa}, n_{Aa}, n_{AA}) \sim \text{Multinomial}\{n, (1 - p_{Aa} - p_{AA}, p_{Aa}, p_{AA})\}$ .  
312 For power evaluation at  $\alpha = 0.05$ , we assumed an additive model with disease prevalence  $K = 0.1$   
313 and penetrance  $P(Y = 1|G = aa) = f_0 = 0.09$ ;  $P(Y = 1|G = AA) = f_2 = (K - f_2p)/(1 - p)$  and  
314  $P(Y = 1|G = Aa) = f_1 = (f_0 + f_2)/2$ . The empirical type 1 error results in Figure 2(a) and 2(b)  
315 confirm the theoretical results in Figure 1:  $T_{allelic}$  is not robust against HWD while the proposed  
316  $T_{RA}$  is accurate across the whole range of HWD values. Further, the empirical power results in  
317 Figures 2(c) and 2(d) highlight the fact that the classical allelic test could have reduced power  
318 when the number of homozygotes  $AA$  is fewer than what is expected under the HWE assumption  
319 (i.e.  $\delta < 0$ ), which is not well acknowledged in the existing literature.

### 320 **5.2 Application 1 - revisit the study of Wittke-Thompson et al. (2005)**

321 For the purpose of studying Hardy–Weinberg disequilibrium in case-control studies, Wittke-Thompson  
322 et al. (2005) identified 60 SNPs from 41 case-control association studies. Focusing on association

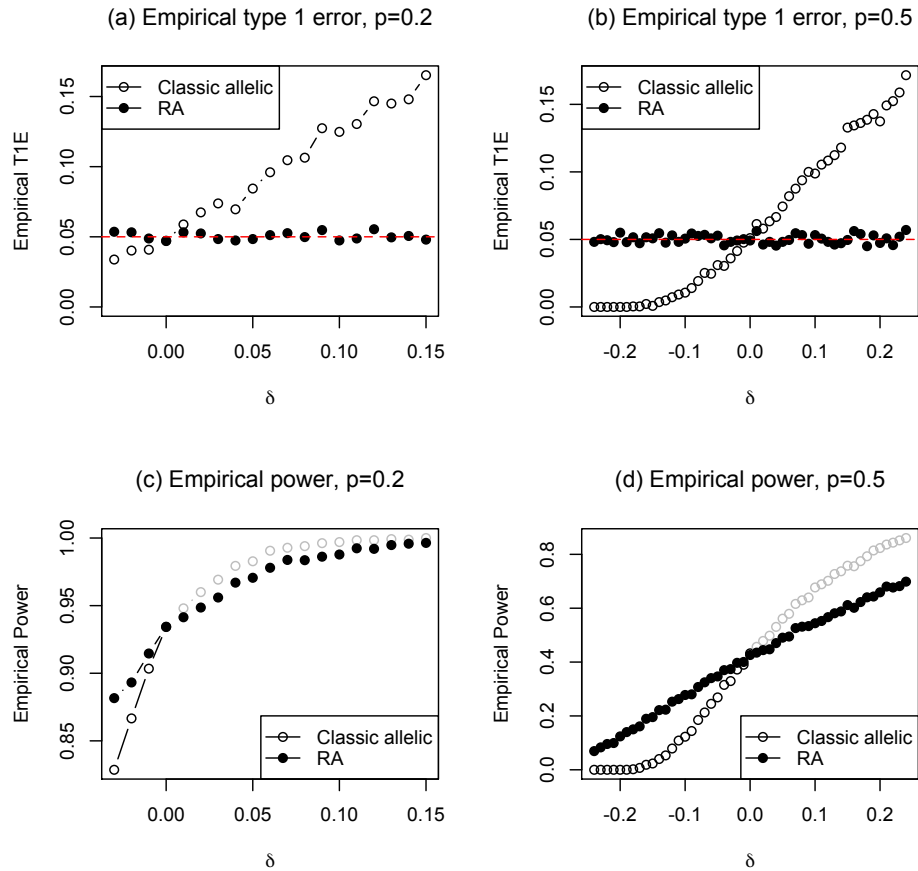

**Figure 2: Empirical type 1 error rate and power of the classical allelic association test and the proposed robust allelic (RA) test at the nominal level of  $\alpha = 0.05$ .** Note that when  $\delta > 0$ , the classical allelic test has inflated type 1 error rate as shown in (a) and (b), so the corresponding power in (c) and (d) is not meaningful and shown in a lighter shade. Also note that the HWD measure  $\delta$  is bounded by the minor allele frequency  $p$ ,  $-p^2 \leq \delta \leq p(1-p)$ .

323 analyses of these 60 bi-allelic markers, we compared  $T_{\text{allelic}}$  with the proposed  $T_{\text{RA}}$  while consid-  
324 ering HWD at each SNP. Figure 3 contrasts  $-\log_{10}(p\text{-values})$  of the two methods, stratified by if  
325 there was an excess ( $\hat{\delta} > 0$ ; unfilled triangles) or lack ( $\hat{\delta} < 0$ ; filled triangles) of the homozygotes  
326 AA with A being the minor allele.

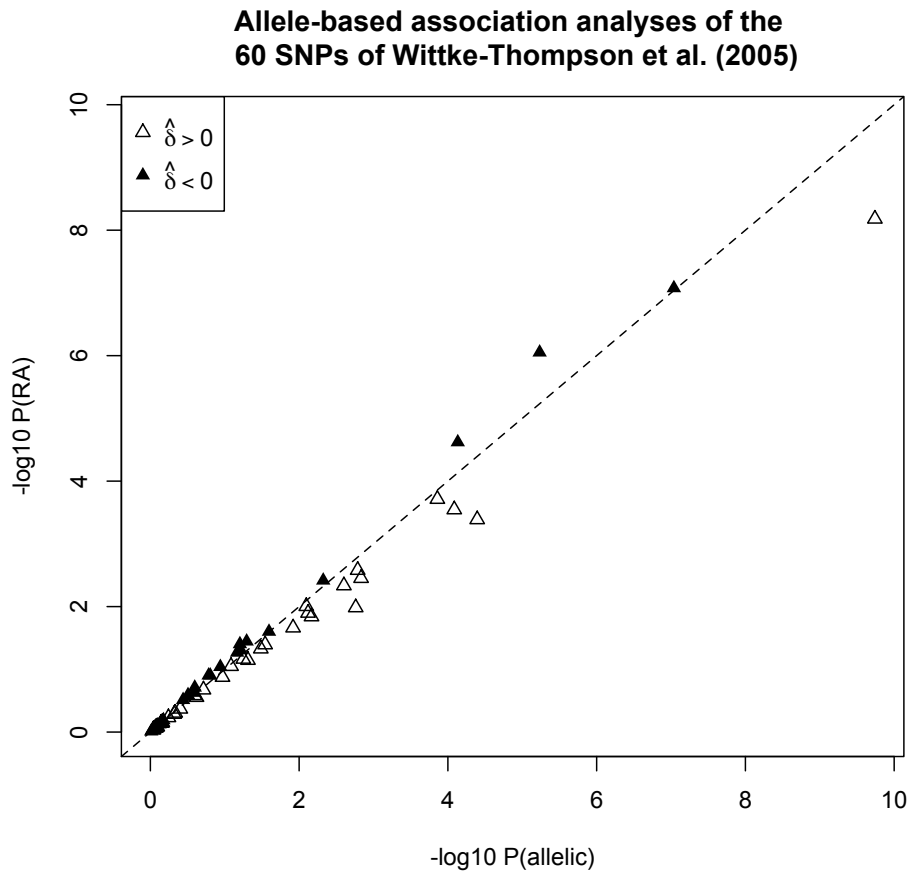

Figure 3: **Results of application 1.** Allele-based association tests of the 60 SNPs identified in Wittke-Thompson et al. (2005), contrasting the proposed RA method,  $T_{\text{RA}}$  in (11), with the classical allelic test,  $T_{\text{allelic}}$  in (2). Unfilled triangles are for SNPs with  $\hat{\delta} > 0$  ( $T_{\text{allelic}}$  having inflated type 1 error), and filled triangles are for SNPs with  $\hat{\delta} < 0$  ( $T_{\text{allelic}}$  having deflated type 1 error); see Figure 1 for theoretical results and Figure 2 for simulation results regarding type 1 error control of the two methods.

327 As anticipated based on the theoretical results in Figure 1 and simulation results in Figure 2, for  
328 SNPs with  $\hat{\delta} > 0$ ,  $T_{\text{allelic}}$  can appear to be more powerful than the proposed  $T_{\text{RA}}$ . For example, for

329 the most significant SNP,  $p\text{-value}_{\text{allelic}} = 1.82 \times 10^{-10}$  and  $p\text{-value}_{\text{RA}} = 6.60 \times 10^{-9}$ . However,  
330  $\hat{\delta} = 0.052 > 0$  with  $p\text{-value}_{\text{HWE}} = 3.09 \times 10^{-4}$ . Thus, the result of  $T_{\text{allelic}}$  is not accurate for this  
331 SNP. In contrast, for the third most significant SNP,  $\hat{\delta} = -0.031 < 0$  and  $p\text{-value}_{\text{HWE}} = 0.040$ . In  
332 that case,  $T_{\text{allelic}}$  is conservative while the proposed  $T_{\text{RA}}$  is not only robust but also more powerful,  
333 where  $p\text{-value}_{\text{allelic}} = 5.84 \times 10^{-6}$  and  $p\text{-value}_{\text{RA}} = 8.86 \times 10^{-7}$ .

### 334 **5.3 Application 2 - a cystic fibrosis (CF) gene modifier study**

335 To demonstrate the generalizability of the proposed RA framework, we applied  $T_{\text{RA}}$  to jointly  
336 analyze two phenotypes using a sample of related individuals from the Canadian cystic fibrosis  
337 (CF) gene modifier study (Sun et al., 2012; Corvol et al., 2015). The two phenotypes of interest  
338 are lung function (a quantitative trait (Taylor et al., 2011)) and meconium ileus (MI, a binary  
339 trait (Gong et al., 2019)). Among the sample of 2,540 CF subjects, 2,420 are singletons and 60  
340 independent sib-pairs. For completeness, we first analyzed each phenotype individually using the  
341 proposed *allele-based* RA framework, and we compared the results with the traditional *genotype-*  
342 *based* method via (generalized) linear mixed models (LMM or GLMM). We then analyzed both  
343 phenotypes jointly using  $T_{\text{RA}}$ .

344 Figures 4(a) and 4(b) show that results of genotype-based and allele-based methods are largely  
345 consistent; see Section 6 for additional discussion. Interestingly, for the most significant SNP as-  
346 sociated with MI in Figure 4(b),  $p\text{-value}$  of  $T_{\text{RA}}$  is  $2.62 \times 10^{-6}$ , slightly smaller than  $7.80 \times 10^{-6}$   
347 of the genotype-based GLMM method. In addition, the proposed  $T_{\text{RA}}$  method can jointly analyzed  
348 both phenotypes and appears to identify SNPs that have  $p\text{-values}$  several orders of magnitude  
349 smaller than that from studying one phenotype at a time, as shown in Figures 4(c) and 4(d). How-  
350 ever, these results do not reach genome-wide significance and establishing true association requires  
351 additional analyses.

352 Table 3 summarizes the association results for previously reported and replicated SNPs associ-  
353 ated with CF lung function (Corvol et al., 2015) and MI association (Sun et al., 2012). Note that

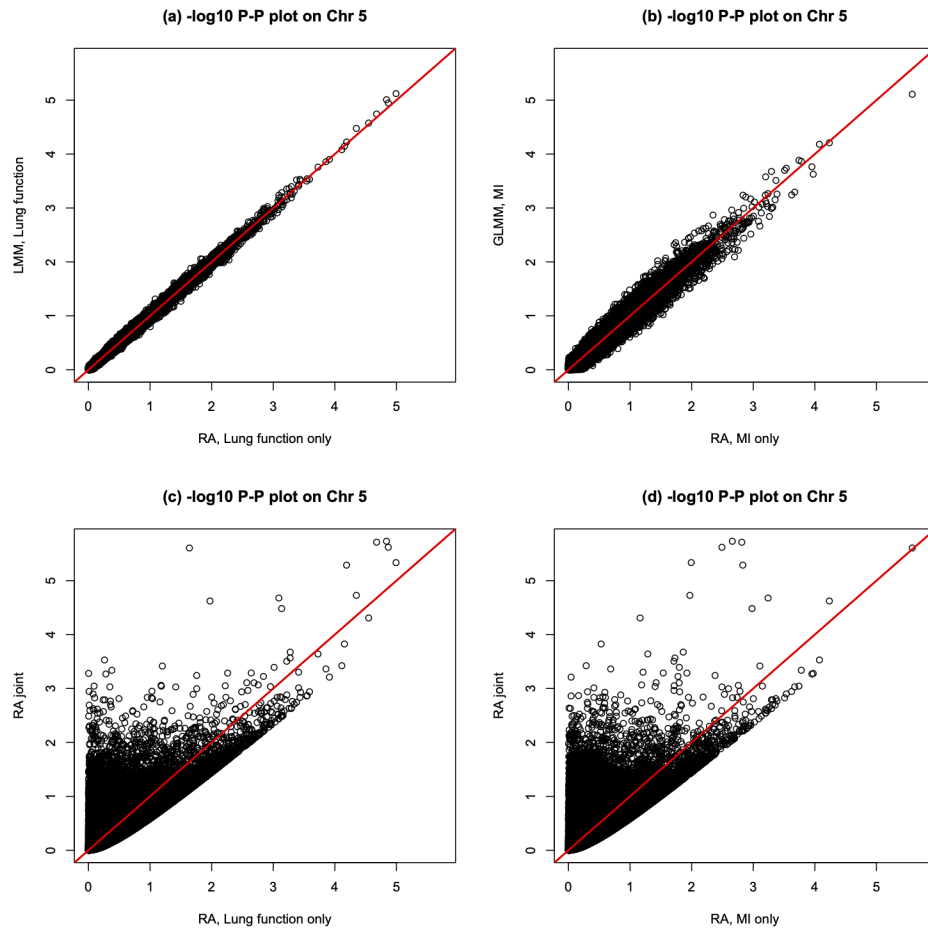

Figure 4: **Results of application 2 - Chromosome 5-wide.** Genetic association studies of lung function and meconium ileus of 34,378 bi-allelic markers on chromosome 5, using a sample of 2,540 individuals with cystic fibrosis of which 2,420 are singletons and 120 are from 60 sib-pairs. LMM and GLMM are *genotype-based* association analyses based on, respectively, linear mixed model for a continuous trait (i.e. lung) and generalized LMM for a binary trait (i.e. MI), and RA is the proposed allele-based association method that can also jointly analyze multiple traits using a sample of related individuals. Genome-wide results are shown in Web Figure 1.

354 the  $p$ -values in Table 3 differ from those in Sun et al. (2012) and Corvol et al. (2015), because the  
355 analyses here only included the Canadian sample and individuals with both phenotypes measured.  
356 For all the SNPs in Table 3, the proposed RA test yields slightly larger  $-\log_{10}(p\text{-values})$  than  
357 LMM or GLMM, suggesting that the allele-based method has the potential to be more powerful  
358 than the traditional genotype-based approach. The joint RA analysis of the two phenotypes did not



Table 3: **Results of application 2 - Previously reported SNPs.** Other details see legend to Figure 4.

| Top CF lung function associated SNPs from Corvol et al. (2015) |            |                      |                    |                                  |
|----------------------------------------------------------------|------------|----------------------|--------------------|----------------------------------|
| Chr                                                            | SNP        | Lung function only   |                    | MI and lung function jointly     |
|                                                                |            | $-\log_{10}P_{LMM}$  | $-\log_{10}P_{RA}$ | $-\log_{10}P_{RA, \text{joint}}$ |
| 3                                                              | rs2246901  | 3.21                 | <b>3.25</b>        | 2.63                             |
| 5                                                              | rs3749615  | 3.25                 | <b>3.27</b>        | 3.57                             |
| 6                                                              | rs2395185  | 6.65                 | <b>6.77</b>        | 6.08                             |
| 11                                                             | rs10466455 | 5.84                 | <b>5.86</b>        | 4.84                             |
| Top CF meconium ileus associated SNPs from Sun et al. (2012)   |            |                      |                    |                                  |
| Chr                                                            | SNP        | MI only              |                    | MI and lung function jointly     |
|                                                                |            | $-\log_{10}P_{GLMM}$ | $-\log_{10}P_{RA}$ | $-\log_{10}P_{RA, \text{joint}}$ |
| 1                                                              | rs4077468  | 5.34                 | <b>5.47</b>        | 4.87                             |
| 1                                                              | rs7512462  | 4.54                 | <b>4.82</b>        | 4.56                             |
| 1                                                              | rs7419153  | 3.68                 | <b>4.07</b>        | 3.35                             |
| 1                                                              | rs12047830 | 3.10                 | <b>3.20</b>        | 2.63                             |

359 lead to more significant results; this is not surprising because these SNPs were selected based on  
 360 the single-phenotype analyses.

## 361 6 Discussion

362 The classical allele-based association test, examining the difference in allele frequency of a bi-  
 363 allelic genetic marker between cases and controls, is intuitive and locally most powerful. As  
 364 pointed out by Sasiemi (1997), for a sample of  $n$  individuals the allelic test ‘doubles’ the sample  
 365 size by considering  $2n$  alleles instead of  $n$  genotypes. However, the work of Sasiemi (1997) also  
 366 highlighted the sensitivity of the allelic test to the assumption of Hardy–Weinberg equilibrium.  
 367 The subsequent development of Schaid and Jacobsen (1999) based on improving variance esti-  
 368 mate is effective, but its application is restricted to case-control studies using independent samples  
 369 and without covariates.

370 Here we developed a novel, robust allele-based (RA) regression framework that regresses the  
 371 individual alleles on the phenotype of interest and covariates if available, generalizing the con-

372 cept of comparing allele frequencies for more complex data. Utilizing the earlier work by Chen  
373 (1983), the proposed regression relies on the Gaussian model of (9) that (i) leads to a valid allelic  
374 association test through testing the regression coefficient  $\beta$ , (ii) analyzes either a binary or a con-  
375 tinuous phenotype, or both, where the phenotype data can be subjected to  $Y$ -dependent sampling,  
376 (iii) adjusts for covariate effects, including population heterogeneity, through additional regression  
377 coefficient  $\gamma$ , (iv) accounts for sample correlation through kinship coefficient  $\phi$  in the covariance  
378 matrix  $\Sigma$ , and (v) explicitly models potential departure from HWE through  $\rho$  in  $\Sigma$ ; see *Remark 3*.  
379 Appealingly, the generalized allelic association test also unifies previous methods; see *Remark 2*.

380 The pivotal stage of this work is designing the two allele-based random variables,  $G_{i1}$  and  $G_{i2}$ ,  
381 and leveraging the regression framework in new settings. The idea of reformulating an existing test  
382 statistic as a regression to facilitate method extension is not new. In their Reader Reaction to the  
383 generalized non-parametric Kurskal-Wallis test of Acar and Sun (2013) for handling group uncer-  
384 tainty, Wu and Guan (2015) presented “*a rank linear regression model and derived the proposed*  
385 *GKW statistic as a score test statistic*”. More recently, Soave and Sun (2017) showed that by first  
386 reformulating the original Levene’s test, testing for variance heterogeneity between  $k$  groups in an  
387 independent sample without group uncertainty, as a two-stage regression, the extension to more  
388 complex data is more straightforward.

389 In our study, the correct representation of  $G_{i1}$  and  $G_{i2}$  is critical. In Section 3.1, we have argued  
390 that splitting the  $n_{Aa}$  heterozygotes into exact halves ( $G_{i1}^*$  and  $G_{i2}^*$ ) reduces the variation inherent  
391 in a randomly selected allele. Looking at it from a different angle, assume that there are only two  
392 individuals with  $Aa$ . In that case, if  $G_{11}^*$  is one for individual 1 then  $G_{21}^*$  must be zero for individual  
393 2, introducing additional dependence between alleles beyond the underlying kinship relationship  
394 and HWD. In contrast, if  $G_{11}$  is one then  $G_{21}$  is yet to be independently determined by the outcome  
395 of tossing a fair coin as defined in (4).

396 The concept of ‘reverse’ regression has also been explored before, focusing on regressing *geno-*  
397 *type* on phenotype, notably by O’Reilly et al. (2012) for joint analyses of multiple phenotypes. The

398 corresponding MultiPhen method uses an ordinal logistic regression for the three genotype groups  
399 and then applies a likelihood ratio test. Although MultiPhen does not require the assumption of  
400 HWE, its application is limited to independent samples and bi-allelic markers.

401 Another stream of genotype-based ‘reverse’ or retrospective approach started with the quasi-  
402 likelihood method of Thornton and McPeck (2007) for case-control association testing with related  
403 individuals. The method first defines  $X_i = G_i/2 \in \{0, 1/2, 1\}$ , then links the mean of  $X_i$  with  $Y_i$  via  
404 a logit transformation and uses the kinship coefficient matrix as the covariate matrix of  $X_i$ , and  
405 finally obtains a quasi-likelihood score test. Subsequently, Feng (2014) and Feng et al. (2011)  
406 extended the method of Thornton and McPeck (2007) to a quasi-likelihood regression model that  
407 can incorporate multiple phenotypes. We note that although  $X_i = G_i/2$  was interpreted as the allele  
408 frequency per individual  $i$  by the previous work, the quasi-likelihood score test is fundamentally a  
409 genotype-based association method. Further, the use of the kinship matrix alone as the covariance  
410 matrix requires the assumption of HWE. Recently, we showed that genotype-based ‘reverse’ re-  
411 gression can be specified in a robust fashion that guards against HWD in related individuals (Zhang  
412 and Sun, 2019).

413 Most existing family-based association studies rely on the  $Y - G$  prospective regression frame-  
414 work via LMM or GLMM (Eu-Ahsunthornwattana et al., 2014). For the application study in Sec-  
415 tion 5.3, we applied both the proposed RA method and LMM (for the continuous CF lung function)  
416 and GLMM (for the binary meconium ileus status). Although there are differences in the (single-  
417 phenotype) analyses (Figures 4(a) and 4(b)), results are remarkably consistent. Interestingly, in  
418 the simplest case of an independent sample with no covariates, we can show analytically that the  
419 corresponding RA test statistic has identical form as that derived from genotype-based prospec-  
420 tive regression model, as well as that from the non-parametric trend test (Web Appendix G). The  
421 similarity with the existing methods indirectly confirms the validity of the proposed approach but  
422 does not take away the contributions of this work. In particular, unlike LMM and GLMM, the pro-  
423 posed ‘reverse’ regression can analyze more than one phenotype at a time as shown in Figures 4(c)

424 and 4(d).

425 One of the challenges related to the proposed framework is the interpretation of parameter es-  
426 timate for  $\beta$  even though its corresponding hypothesis testing is valid. Thus, we emphasize that  
427 the method developed here is tailored for variant detection, providing a statistically efficient and  
428 computationally fast way for genome-wide association scans. Another difficulty present in any ‘re-  
429 verse’ regression approach is the modelling and interpretation of gene-gene or gene-environment  
430 interactions. It is also not clear how to perform allelic association test for X-chromosomal variants;  
431 see Chen et al. (2018) for genotype-based association methods. However, the proposed framework  
432 is flexible and promising in a number of other ways.

433 For example, the inclusion of parameter  $\rho$  in the RA model (9) is advantageous for both method  
434 comparison and further development. In the absence of  $Y$  and  $Z$  and sample correlation, the score  
435 test derived from the reduced model is equivalent to the traditional Pearson  $\chi^2$  test of HWE using  
436 a sample of independent genotype observations; see *Remark 1*. For more complex data, instead  
437 of developing individual remedies addressing specific challenges, the proposed method provides a  
438 principled approach for extensions. For example, we have shown in Section 4.1 that by introducing  
439 a population indicator we can derive a HWE test across populations. Similarly, testing  $H_0 : \delta_2 =$   
440  $\delta_3 = \delta_4 = 0$  using model (16) in Section 4.2 leads to a HWE test for tri-allelic markers. Finally,  
441 using the generalized RA model (17) in Section 4.4, we can develop a score test of HWE that  
442 naturally accounts for sample correlation present in pedigree data.

443 In terms of association testing, the value of introducing  $\rho$  in the regression model is two fold.  
444 First, if there is a strong prior evidence for HWE, we can restrict  $\rho$  to be zero and establish a  
445 locally most powerful score test. Second, for the special case of a case-control study, Song and  
446 Elston (2006) and Wang and Shete (2010) have argued that departure from HWE in the case group  
447 provides additional association evidence. However, their methods are ad-hoc. For example, the  
448 method of Song and Elston (2006) first conducts genotype-based association test and Pearson  $\chi^2$   
449 test of HWE separately, then aggregates the two (dependent) tests by a weighted sum, and finally

450 evaluates the statistical significance via simulations. The proposed RA regression framework offers  
451 a conceivable approach to directly incorporate group-specific  $\rho$  into association inference, which  
452 we will explore as future work.

## 453 **7 Acknowledgment**

454 The authors thank Dr. Lisa J. Strug and her lab for providing the cystic fibrosis application data.  
455 This research is funded by the Natural Sciences and Engineering Research Council of Canada  
456 (NSERC, RGPIN-04934 and RGPAS-522594), and the Canadian Institutes of Health Research  
457 (CIHR, MOP-310732) to LS. LZ is a trainee of the CIHR STAGE (Strategic Training in Advanced  
458 Genetic Epidemiology) training program at the University of Toronto.

## 459 **References**

- 460 Acar, E. F., and L. Sun, 2013: A generalized kruskal–wallis test incorporating group uncertainty  
461 with application to genetic association studies. *Biometrics*, **69** (2), 427–435.
- 462 Bourgain, C., M. Abney, D. Schneider, C. Ober, and M. S. McPeck, 2004: Testing for hardy-  
463 weinberg equilibrium in samples with related individuals. *Genetics*, **168** (4), 2349–2361.
- 464 Bourgain, C., and Coauthors, 2003: Novel case-control test in a founder population identifies  
465 p-selectin as an atopy-susceptibility locus. *The American Journal of Human Genetics*, **73** (3),  
466 612–626.
- 467 Chen, B., R. V. Craiu, L. J. Strug, and L. Sun, 2018: The x factor: A robust and pow-  
468 erful approach to x-chromosome-inclusive whole-genome association studies. *arXiv preprint*  
469 *arXiv:1811.00964*.

- 470 Chen, C.-F., 1983: Score tests for regression models. *Journal of the American Statistical Associa-*  
471 *tion*, **78 (381)**, 158–161.
- 472 Corvol, H., and Coauthors, 2015: Genome-wide association meta-analysis identifies five modifier  
473 loci of lung disease severity in cystic fibrosis. *Nature communications*, **6**, 8382.
- 474 Derkach, A., J. F. Lawless, and L. Sun, 2015: Score tests for association under response-dependent  
475 sampling designs for expensive covariates. *Biometrika*, **102 (4)**, 988–994.
- 476 Diaz-Papkovich, A., L. Anderson-Trocmé, and S. Gravel, 2019: Umap reveals cryptic population  
477 structure and phenotype heterogeneity in large genomic cohorts. *PLoS genetics*, **15 (11)**.
- 478 Dimitromanolakis, A., A. D. Paterson, and L. Sun, 2019: Fast and accurate shared segment detec-  
479 tion and relatedness estimation in un-phased genetic data via truffle. *The American Journal of*  
480 *Human Genetics*, **105 (1)**, 78–88.
- 481 Eu-Ahsunthornwattana, J., E. N. Miller, M. Fakiola, S. M. Jeronimo, J. M. Blackwell, H. J. Cordell,  
482 W. T. C. C. C. 2, and Coauthors, 2014: Comparison of methods to account for relatedness in  
483 genome-wide association studies with family-based data. *PLoS Genetics*, **10 (7)**, e1004445.
- 484 Feng, Z., 2014: A generalized quasi-likelihood scoring approach for simultaneously testing the  
485 genetic association of multiple traits. *Journal of the Royal Statistical Society: Series C (Applied*  
486 *Statistics)*, **63 (3)**, 483–498.
- 487 Feng, Z., W. W. Wong, X. Gao, and F. Schenkel, 2011: Generalized genetic association study with  
488 samples of related individuals. *The Annals of Applied Statistics*, 2109–2130.
- 489 Gong, J., and Coauthors, 2019: Genetic association and transcriptome integration identify con-  
490 tributing genes and tissues at cystic fibrosis modifier loci. *PLoS genetics*, **15 (2)**, e1008007.
- 491 Hardy, G. H., and Coauthors, 1908: Mendelian proportions in a mixed population. *Science*,  
492 **28 (706)**, 49–50.

- 493 Hill, W. G., M. E. Goddard, and P. M. Visscher, 2008: Data and theory point to mainly additive  
494 genetic variance for complex traits. *PLoS Genetics*, **4** (2), e1000008.
- 495 Jakobsson, M., and Coauthors, 2008: Genotype, haplotype and copy-number variation in world-  
496 wide human populations. *Nature*, **451** (7181), 998–1003.
- 497 Lauretto, M. S., F. Nakano, S. R. Faria Jr, C. A. Pereira, and J. M. Stern, 2009: A straightforward  
498 multiallelic significance test for the hardy-weinberg equilibrium law. *Genetics and Molecular  
499 Biology*, **32** (3), 619–625.
- 500 O’Reilly, P. F., C. J. Hoggart, Y. Pomyen, F. C. Calboli, P. Elliott, M.-R. Jarvelin, and L. J. Coin,  
501 2012: Multiphen: joint model of multiple phenotypes can increase discovery in gwas. *PLoS One*,  
502 **7** (5), e34861.
- 503 Reich, D., A. L. Price, and N. Patterson, 2008: Principal component analysis of genetic data.  
504 *Nature genetics*, **40** (5), 491.
- 505 Sasieni, P. D., 1997: From genotypes to genes: doubling the sample size. *Biometrics*, 1253–1261.
- 506 Schaid, D. J., and S. J. Jacobsen, 1999: Biased tests of association: comparisons of allele fre-  
507 quencies when departing from hardy-weinberg proportions. *American Journal of Epidemiology*,  
508 **149** (8), 706–711.
- 509 Schaid, D. J., J. P. Sinnwell, and G. D. Jenkins, 2012: Regression modeling of allele frequencies  
510 and testing hardy weinberg equilibrium. *Human heredity*, **74** (2), 71–82.
- 511 Soave, D., and L. Sun, 2017: A generalized levene’s scale test for variance heterogeneity in the  
512 presence of sample correlation and group uncertainty. *Biometrics*, **73** (3), 960–971.
- 513 Song, K., and R. C. Elston, 2006: A powerful method of combining measures of association and  
514 hardy–weinberg disequilibrium for fine-mapping in case-control studies. *Statistics in Medicine*,  
515 **25** (1), 105–126.

- 516 Sun, L., and Coauthors, 2012: Multiple apical plasma membrane constituents are associated with  
517 susceptibility to meconium ileus in individuals with cystic fibrosis. *Nature genetics*, **44 (5)**, 562.
- 518 Taylor, C., and Coauthors, 2011: A novel lung disease phenotype adjusted for mortality attrition  
519 for cystic fibrosis genetic modifier studies. *Pediatric pulmonology*, **46 (9)**, 857–869.
- 520 Thornton, T., and M. S. McPeck, 2007: Case-control association testing with related individuals:  
521 a more powerful quasi-likelihood score test. *The American Journal of Human Genetics*, **81 (2)**,  
522 321–337.
- 523 Troendle, J., and K. Yu, 1994: A note on testing the hardy-weinberg law across strata. *Annals of*  
524 *human genetics*, **58 (4)**, 397–402.
- 525 Wang, J., and S. Shete, 2010: Using both cases and controls for testing hardy-weinberg proportions  
526 in a genetic association study. *Human Heredity*, **69 (3)**, 212–218.
- 527 Wang, T., 2011: On coding genotypes for genetic markers with multiple alleles in genetic associa-  
528 tion study of quantitative traits. *BMC genetics*, **12 (1)**, 82.
- 529 Weinberg, W., 1908: On the demonstration of heredity in man. (1963) *Papers on human genetics*.
- 530 Weir, B., 1996: Genetic analysis ii. *Sinauer: Sunderland, MA*.
- 531 Wittke-Thompson, J. K., A. Pluzhnikov, and N. J. Cox, 2005: Rational inferences about departures  
532 from hardy-weinberg equilibrium. *The American Journal of Human Genetics*, **76 (6)**, 967–986.
- 533 Wu, B., and W. Guan, 2015: Reader reaction on the generalized kruskal–wallis test for genetic  
534 association studies incorporating group uncertainty. *Biometrics*, **71 (2)**, 556–557.
- 535 Zhang, L., and L. Sun, 2019: On a unifying "reverse" regression for robust association studies and  
536 allele frequency estimation with related individuals. *bioRxiv*, 470328.
